# Supplementary material for: G1 checkpoint establishment in vivo during embryonic liver development
Source: PubMed Central journal article supplement (PMC4031160; doi:10.1186/1471-213x-14-23), 2014-05-19

Table S1. Primers for *in vitro* NHEJ assay and mouse gene expression

| Primers                  | Forward primer (F)            | Reverse primer (R)            |
|--------------------------|-------------------------------|-------------------------------|
| Set A (loading control)  | F: 5'-GGTGATGACGGTGAAAACCT-3' | R: 5'-GCTCTGATGCCGCATAGTTA-3' |
| Set B (joining junction) | F: 5'-GGAGAAAATACCGCATCAGG-3' | R: 5'-GAGTCAGTGAGCGAGGAAGC-3' |

**Figure S1**

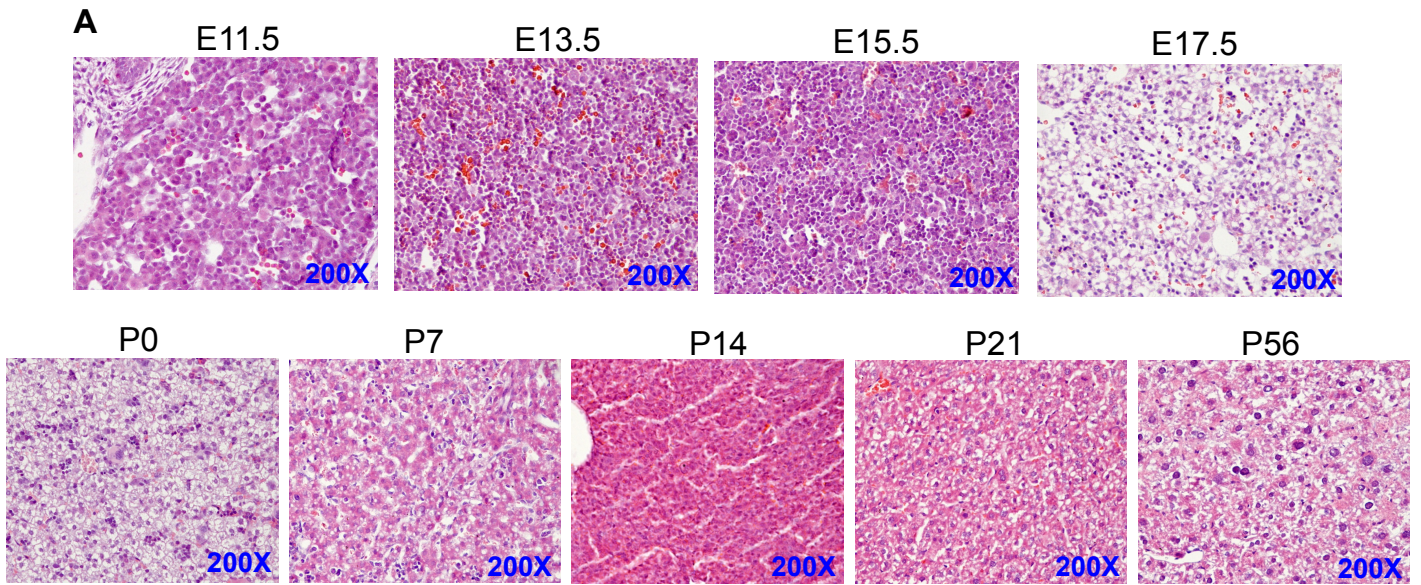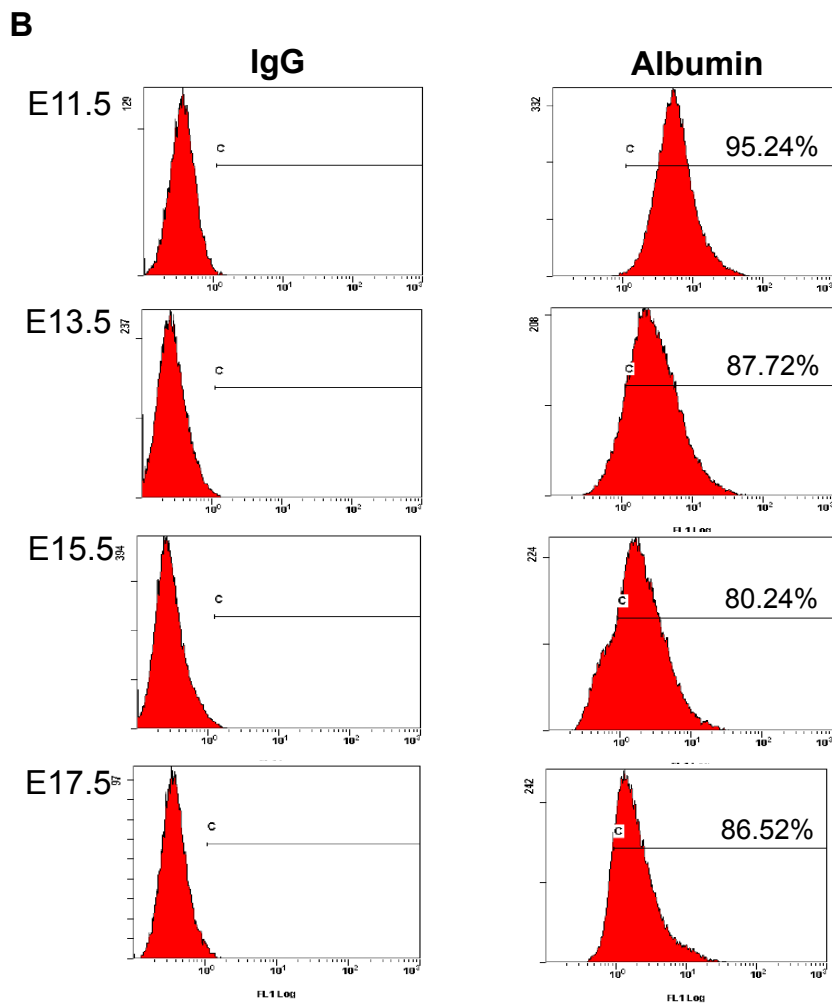

Figure S2

A

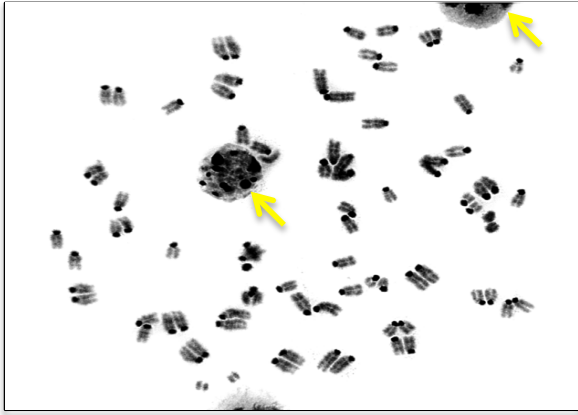

B

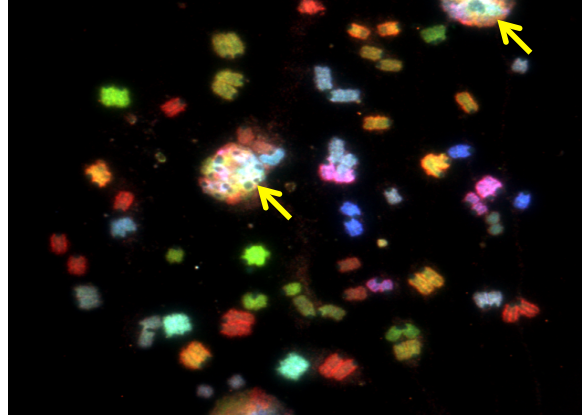

Supplement: 1471-213X-14-23-S1.pdf [file 1471-213X-14-23-S1.pdf]
